# Supplementary material
Source: PubMed Central journal article supplement (PMC6397092)

**Supplemental Figure S1. Structures of PAR4 antagonists VU0652925 and VU0661245.**

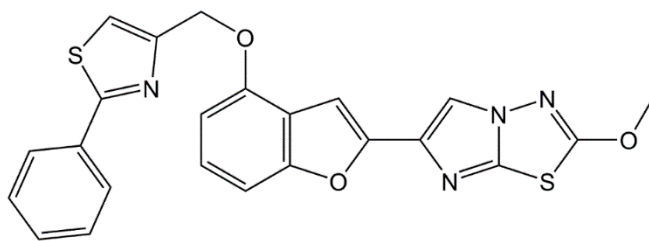

**VU0652925**

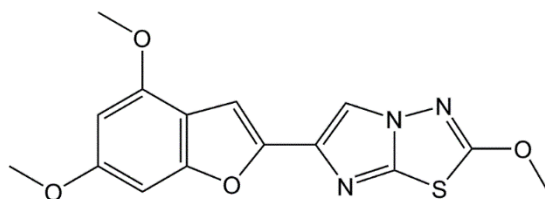

**VU0661245**

**Supplemental Figure S2. Inhibition of thrombin-mediated platelet activation by PAR4**

**antagonists VU0652925 and VU0661245.** Platelets were pre-treated with increasing concentrations (shown in log scale) of VU0652925 or VU0661245 for 20 minutes before activation with 100 nM or 316 nM  $\gamma$ -thrombin. Platelet activation was measured as integrin  $\alpha$ IIB $\beta$ 3 inside-out activation (PAC1 expression) by flow cytometry. Data are normalized to vehicle control and displayed as means  $\pm$  S.E.M.; n = 3.

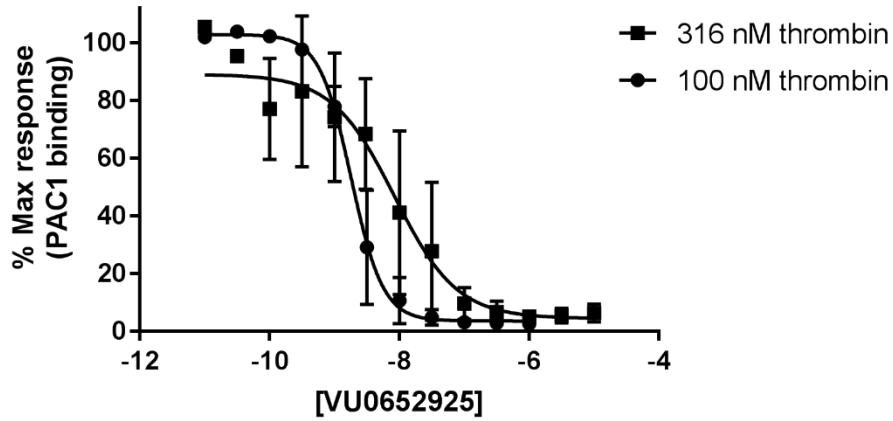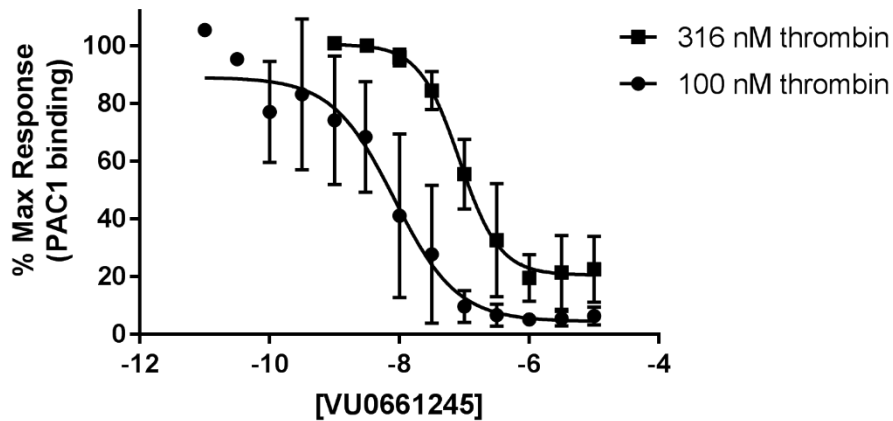

**Supplemental Figure S3. Ultrastructural analysis of granulocyte-platelet interactions from purified isolates.** Washed human platelets ( $20 \times 10^7/\text{ml}$ ) and purified granulocytes ( $20 \times 10^6/\text{ml}$ ) from the same donor were combined and activated with human  $\alpha$ -thrombin (5 nM = 0.7 U/ml) before preparation for electron microscopy. Granulocytes were identified by characteristic ultrastructural features. (A-B) Platelets (arrows) are shown interacting with one granulocyte in each image. Interactions show characteristic molding of surface morphology and cohesion. Scale bar for each panel = 1  $\mu\text{m}$ .

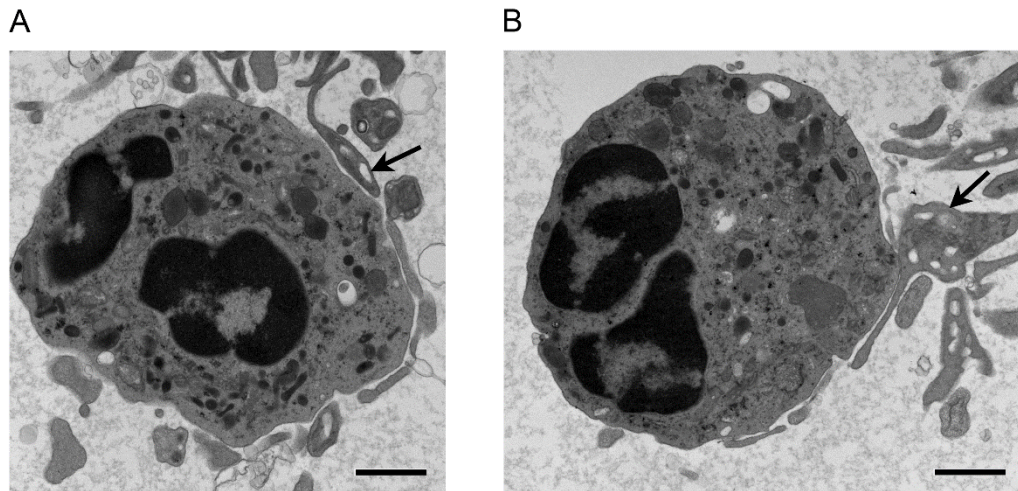

Supplement: NIHMS1508353-supplement-Supp1.pdf [file NIHMS1508353-supplement-Supp1.pdf]
